# Supplementary material for: Assessment of graphene aerogel matrix solid-phase dispersion as sample preparation for the determination of chlorophenols in soil
Source: Royal Society of Chemistry journal article supplement (doi:10.1039/c8nj00942b), 2018-01-01
Supplement: c8nj00942b1.pdf [file c8nj00942b1.pdf]

## Supporting Information

### **Assessment of graphene aerogels matrix solid-phase dispersion as sample preparation for the determination of chlorophenols in soil**

Xuemei Wang <sup>a,b,\*</sup>, Tongtong Du <sup>a</sup>, Juan Wang <sup>a</sup>, Haixia Kou <sup>a</sup>, Xinzhen Du <sup>a,b</sup>, Xiaoquan Lu <sup>a,b</sup>

<sup>a</sup> College of Chemistry and Chemical Engineering, Northwest Normal University,

<sup>b</sup> Key Laboratory of Bioelectrochemistry & Environmental Analysis of Gansu Province,

Lanzhou 730070, P. R. China

---

\* Corresponding author, Tel: +86-931-7973035

*E-mail address:* wxm98@163.com (X.M. Wang)

**Table S-1** The Chemical structures of six CPs.

| Chemical  | Formula       | CAS Number | Structure                                                                            | M      |
|-----------|---------------|------------|--------------------------------------------------------------------------------------|--------|
| 3-CP      | $C_6H_5ClO$   | 108-43-0   | 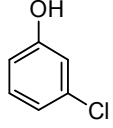   | 128.56 |
| 4-CP      | $C_6H_5ClO$   | 106-48-9   |    | 128.56 |
| 2,3-DCP   | $C_6H_4Cl_2O$ | 576-24-9   |    | 163.0  |
| 2,4-DCP   | $C_6H_4Cl_2O$ | 120-83-2   |    | 163.0  |
| 3,4-DCP   | $C_6H_4Cl_2O$ | 95-77-2    |  | 163.0  |
| 2,4,6-TCP | $C_6H_3Cl_3O$ | 88-06-2    |  | 197.45 |
